# Supplementary material for: Whole-Body Imaging for the Primary Staging of Melanomas—A Single-Center Retrospective Study
Source: MDPI journal article supplement (doi:10.3390/cancers15215265), 2023-11-02
Supplement: s1 [file s1]

Supplementary Table 1. Patients with melanoma-associated positive findings in primary staging

| Nr.  | Sex | Age | Tumor Thickness | Ulceration | Indication PET | AJCC | Localisation Primary | Tumor Marker* | PET: Metastasis |    |       | Localisation Of Metastasis  | PET Positive | CT Positive | SLNB Conducted | SLNB Result | PET Result Compared To Histological Or Clinical Follow-up | LAD | Other Surgery | ICI | Targeted Therapy | IFN | Radiation |
|------|-----|-----|-----------------|------------|----------------|------|----------------------|---------------|-----------------|----|-------|-----------------------------|--------------|-------------|----------------|-------------|-----------------------------------------------------------|-----|---------------|-----|------------------|-----|-----------|
|      |     |     |                 |            |                |      |                      |               | LN              | ST | Other |                             |              |             |                |             |                                                           |     |               |     |                  |     |           |
| 1    | f   | 55  | >15             | yes        | pT4b           | IIIB | trunk                | elevated      | x               |    |       | axillary                    | x            | x           | no             |             | correct                                                   | x   |               | x   |                  |     |           |
| 2    | f   | 35  | 5.4             | yes        | pT4b           | IIIC | trunk                | normal        | x               |    |       | axillary                    | x            | x           | no             |             | correct                                                   | x   |               |     |                  | x   | x         |
| 3    | f   | 51  | 5.5             | yes        | pT4b           | IIIC | lower leg            | normal        | x               |    |       | inguinal                    | x            | x           | yes            | positive    | correct                                                   |     |               | x   |                  |     |           |
| 4    | m   | 43  | 7.0             | yes        | pT4b           | IIIC | trunk                | normal        | x               |    |       | axillary                    | x            | x           | no             |             | correct                                                   | x   |               | x   |                  |     |           |
| 5    | m   | 45  | 2.8             | no         | ###            | IIIC | trunk                | normal        | x               |    |       | axillary                    | x            | x           | yes            | positive    | partially correct                                         |     |               | x   |                  |     |           |
| 6    | m   | 80  | 2.2             | yes        | ###            | IIIC | trunk                | normal        | x               |    |       | axillary                    | x            | x           | no             |             | correct                                                   | x   |               |     | x                |     | x         |
| 7    | f   | 48  | >6              | yes        | pT4b           | IIID | trunk                | normal        | x               |    |       | axillary                    | x            | (x)         | yes            | positive    | correct                                                   |     |               |     | x                |     |           |
| 8    | m   | 73  | 7.5             | yes        | pT4b           | IIIC | trunk                | normal        | x               |    |       | axillary                    | (x)          | x           | yes            | positive    | partially correct                                         |     |               |     | x                |     | x         |
| 9    | f   | 75  | 11              | yes        | pT4b           | IIID | foot                 | elevated      | x               |    |       | inguinal                    | x            | x           | no             |             | correct                                                   | x   |               | x   |                  |     | x         |
| 10   | f   | 72  | 3.1             | yes        | ###            | IIIC | foot                 | elevated      | x               |    |       | inguinal                    | x            | x           | no             |             | correct                                                   | x   |               | x   |                  |     |           |
| 11   | m   | 80  | 3.6             | yes        | ###            | IIIC | knee                 | normal        | x               |    |       | inguinal                    | x            | x           | no             |             | correct                                                   |     | x             | x   |                  |     |           |
| 12   | m   | 39  | >8              | yes        | pT4b           | IIIC | trunk                | normal        | x               |    |       | inguinal                    | x            | x           | no             |             | partially correct                                         |     | x             | x   |                  |     |           |
| 13   | m   | 77  | 2.5             | no         | ALM            | IIIC | foot                 | normal        | x               |    |       | popliteal + inguina         | x            | x           | no             |             | partially correct                                         | x   |               | x   |                  |     |           |
| 14   | f   | 71  | >10             | no         | pT4a           | IIIC | upper arm            | elevated      | x               |    |       | axillary                    | x            | x           | no             |             | correct                                                   | x   |               | x   |                  |     | x         |
| 15   | m   | 70  | 4.5             | yes        | pT4b           | IIIC | trunk                | elevated      | x               |    |       | axillary                    | x            | x           | no             |             | partially correct                                         |     | x             | x   |                  |     |           |
| 16   | f   | 55  | >7              | yes        | pT4b           | IV   | lower leg            | normal        | x               |    |       | inguinal + iliacal          | x            | x           | no             |             | correct                                                   |     | x             | x   |                  |     |           |
| 17   | f   | 75  | 4.5             | yes        | pT4b           | IIIB | finger               | elevated      | x               |    |       | axillary                    | x            | x           | no             |             | correct                                                   | x   |               | x   |                  |     |           |
| 18   | f   | 82  | ##              | ##         | ###            | IVA  | mucosal              | elevated      | x               |    |       | jaw angle                   | x            | x           | no             |             | correct                                                   | x   |               | x   |                  |     |           |
| 19   | m   | 73  | 7.5             | yes        | pT4b           | IIIC | trunk                | normal        | x               |    |       | axillary                    | x            | x           | yes            | positive    | partially correct                                         |     |               | x   |                  |     |           |
| 20   | f   | 82  | 18              | yes        | pT4b           | IIID | trunk                | elevated      | x               |    |       | axillary                    | x            | x           | no             |             | correct                                                   | x   |               | x   |                  |     | x         |
| 21   | f   | 54  | 5.2             | no         | pT4a           | IIIC | scalp                | normal        | x               |    |       | cervical                    | x            | x           | no             |             | correct                                                   | x   | x             | x   |                  |     |           |
| 22   | m   | 69  | >11             | yes        | pT4b           | IV   | trunk                | normal        | x               |    |       | inguinal                    | x            | x           | no             |             | correct                                                   |     | x             |     |                  |     |           |
| 23   | m   | 78  | 6.2             | yes        | pT4b           | IIIC | trunk                | normal        | x               |    |       | axillary                    | x            | x           | yes            | positive    | correct                                                   |     |               | x   |                  |     |           |
| 24   | m   | 52  | 7.0             | yes        | pT4b           | IIIB | upper leg            | normal        | x               |    |       | inguinal                    | x            | x           | no             |             | correct                                                   | x   |               | x   |                  |     | x         |
| 25   | m   | 75  | 6.5             | no         | pT4a           | IIIC | lower leg            | normal        | x               |    |       | popliteal + inguina         | x            | x           | yes            | positive    | correct                                                   |     |               | x   |                  |     |           |
| 26   | f   | 68  | 6.0             | yes        | pT4b           | IIC  | trunk                | normal        | x               |    |       | axillary                    | (x)          | x           | no             |             | false positive                                            | x   |               |     |                  |     |           |
| 27   | m   | 56  | >10             | yes        | pT4b           | IIC  | trunk                | normal        | x               |    |       | axillary                    | x            | 0           | yes            | negative    | false positive                                            |     |               | x   |                  |     |           |
| 28   | f   | 74  | 4.7             | no         | pT4a           | IIB  | trunk                | normal        | x               |    |       | axillary                    | x            | 0           | no             |             | false positive                                            |     |               |     |                  |     |           |
| 29   | m   | 77  | 5.6             | yes        | pT4b           | IV   | trunk                | normal        |                 |    | x     | lung, liver                 | x            | x           | no             |             | correct                                                   |     |               | x   |                  |     |           |
| 30   | m   | 77  | 5.0             | yes        | pT4b           | IV   | face                 | normal        |                 | x  |       | parotis                     | x            | x           | no             |             | correct                                                   | x   |               | x   |                  |     | x         |
| 31   | m   | 44  | >6              | yes        | pT4b           | IV   | trunk                | elevated      |                 | x  |       | thorax                      | x            | x           | no             |             | correct                                                   |     | (x)           |     | x                |     | x         |
| 32   | m   | 66  | #               | #          | pT3            | IV   | mucosal              | normal        |                 | x  |       | muscle of back skin, fat of | x            | x           | no             |             | correct                                                   |     | x             | x   |                  |     |           |
| 33   | f   | 78  | 7.0             | yes        | pT4b           | IIIC | scalp                | normal        |                 | x  |       | retroauricular              | x            | x           | no             |             | correct                                                   |     | x             | x   |                  |     | x         |
| 34   | m   | 78  | >5              | yes        | pT4b           | IIIC | face                 | elevated      |                 | x  |       | cheek                       | x            | x           | no             |             | correct                                                   |     | x             | x   |                  |     |           |
| (35) | m   | 57  | 5               | yes        | pT4b           | IIIC | upper leg            | normal        | x               |    |       | inguinal                    |              | x           | yes            |             | partially correct                                         |     |               | x   |                  |     |           |

\* LDH or S-100 above reference values, LN lymph node metastasis, ST soft tissue metastasis, LAD lymphadenectomy, ICI immune-checkpoint inhibitor therapy, IFN Interferon, # mucosal melanoma, ## unknown, ### clinical suspicion of lymph node metastasis, ALM acrolentiginous melanoma, (x) planned, ( ) CT only
