# Supplementary material for: Whole-Body Imaging for the Primary Staging of Melanomas—A Single-Center Retrospective Study
Source: MDPI journal article supplement (doi:10.3390/cancers15215265), 2023-11-02
Supplement: s1 [file s1]

Supplementary Table 2. Patients without any melanoma-associated findings in primary staging

| Nr.  | Sex | Age | Tumor Thickness | Ulceration | Indication PET | AJCC | Localisation Primary | Tumor Marker* | PET Result                                                                                         | SLNB Result | PET Result Compared To Histological Or Clinical Follow-up |
|------|-----|-----|-----------------|------------|----------------|------|----------------------|---------------|----------------------------------------------------------------------------------------------------|-------------|-----------------------------------------------------------|
| 1    | m   | 62  | 4.2             | yes        | pT4b           | IIC  | trunk                | normal        | negative                                                                                           | negative    | correct                                                   |
| 2    | f   | 57  | 3.9             | no         | pT3a           | IIB  | upper leg            | normal        | negative                                                                                           | negative    | correct                                                   |
| 3    | f   | 70  | 5.4             | yes        | pT4b           | IIC  | lower leg            | normal        | negative                                                                                           | negative    | correct                                                   |
| 4    | m   | 78  | 6.0             | yes        | pT4b           | IIC  | lower arm            | normal        | urinary stasis and prostate cancer                                                                 | negative    | correct                                                   |
| 5    | m   | 73  | 5.8             | yes        | pT4b           | IIC  | trunk                | normal        | negative                                                                                           | negative    | correct                                                   |
| 6    | f   | 79  | 4.2             | yes        | pT4b           | IIC  | face                 | normal        | negative                                                                                           | negative    | correct                                                   |
| 7    | m   | 53  | 4.0             | yes        | pT3b           | IIB  | lower leg            | normal        | negative                                                                                           | negative    | correct                                                   |
| 8    | m   | 76  | >5              | ##         | pT4            | IIIC | foot                 | normal        | negative                                                                                           | negative    | correct                                                   |
| 9    | f   | 58  | 6.3             | yes        | pT4b           | IV   | trunk                | normal        | negative                                                                                           | -           | correct                                                   |
| 10   | m   | 51  | 3.5             | yes        | pT3b           | IIB  | trunk                | elevated      | negative                                                                                           | negative    | correct                                                   |
| 11   | f   | 49  | 3.8             | yes        | pT3b           | IIB  | trunk                | normal        | negative                                                                                           | negative    | correct                                                   |
| 12   | m   | 51  | 4.3             | no         | pT4a           | IIB  | upper arm            | elevated      | negative                                                                                           | negative    | correct                                                   |
| 13   | m   | 77  | 4.1             | yes        | pT4b           | IIC  | upper arm            | normal        | negative                                                                                           | -           | correct                                                   |
| 14   | m   | 69  | 10              | yes        | pT4b           | IIC  | upper leg            | elevated      | negative                                                                                           | negative    | correct                                                   |
| 15   | m   | 55  | 8               | yes        | pT4b           | IIC  | trunk                | normal        | negative                                                                                           | negative    | correct                                                   |
| 16   | f   | 74  | 8               | yes        | pT4b           | IIC  | face                 | elevated      | negative                                                                                           | negative    | correct                                                   |
| 17   | f   | 84  | 4.2             | yes        | pT4b           | IIC  | face                 | elevated      | negative                                                                                           | negative    | correct                                                   |
| 18   | m   | 77  | 4.1             | no         | pT4a           | IIB  | trunk                | normal        | negative                                                                                           | negative    | correct                                                   |
| 19   | m   | 80  | 15              | no         | pT4a           | IV   | trunk                | normal        | negative                                                                                           | -           | correct                                                   |
| 20   | m   | 33  | 6.8             | no         | pT4a           | IIB  | trunk                | normal        | negative                                                                                           | negative    | correct                                                   |
| 21   | m   | 78  | 5.1             | yes        | pT4b           | IIC  | face                 | normal        | negative                                                                                           | negative    | correct                                                   |
| 22   | f   | 68  | #               | yes        | pT4b           | IIC  | mucosal              | normal        | negative                                                                                           | negative    | correct                                                   |
| 23   | m   | 80  | 5.4             | no         | pT4a           | IIB  | scalp                | elevated      | negative                                                                                           | -           | correct                                                   |
| 24   | f   | 82  | 5               | yes        | pT4b           | IIC  | upper arm            | normal        | negative                                                                                           | negative    | correct                                                   |
| 25   | m   | 79  | 9.7             | yes        | pT4b           | IIC  | trunk                | normal        | negative                                                                                           | -           | correct                                                   |
| 26   | f   | 52  | 5.5             | no         | pT4a           | IIB  | foot                 | normal        | negative                                                                                           | negative    | correct                                                   |
| 27   | f   | 63  | >6              | yes        | pT4b           | IIC  | lower leg            | normal        | negative                                                                                           | negative    | correct                                                   |
| 28   | m   | 85  | >7              | yes        | pT4b           | IIC  | neck                 | normal        | negative                                                                                           | -           | correct                                                   |
| 29   | m   | 79  | >5              | yes        | pT4b           | IIIC | trunk                | normal        | negative                                                                                           | negative    | correct                                                   |
| 30   | f   | 71  | 4.2             | no         | pT4a           | IIB  | hand                 | normal        | negative                                                                                           | negative    | correct                                                   |
| 31   | m   | 62  | ##              | yes        | ALM            | II   | foot                 | elevated      | negative                                                                                           | negative    | correct                                                   |
| 32   | f   | 73  | 4.3             | yes        | pT4b           | IIC  | foot                 | normal        | negative                                                                                           | negative    | correct                                                   |
| 33   | f   | 73  | 3.5             | yes        | pT3b           | IIB  | foot                 | elevated      | negative                                                                                           | negative    | correct                                                   |
| 34   | m   | 48  | 5.1             | yes        | pT4b           | IIC  | upper leg            | normal        | negative                                                                                           | negative    | correct                                                   |
| 35   | f   | 78  | 4.8             | no         | pT4a           | IIB  | scalp                | normal        | negative                                                                                           | -           | correct                                                   |
| 36   | f   | 4   | 4.1             | no         | pT4a           | IIB  | lower leg            | elevated      | negative                                                                                           | -           | correct                                                   |
| 37   | f   | 51  | 4.9             | yes        | pT4b           | IIC  | upper leg            | elevated      | negative                                                                                           | negative    | correct                                                   |
| 38   | m   | 80  | 5.4             | no         | pT4a           | IIC  | scalp                | elevated      | negative                                                                                           | -           | correct                                                   |
| 39   | f   | 84  | 4.1             | yes        | pT4b           | IIC  | lower leg            | normal        | mamma carcinoma                                                                                    | -           | correct                                                   |
| 40   | f   | 82  | 6               | yes        | pT4b           | IIC  | upper arm            | normal        | multiple axillary, retro- and interpectoral lymph nodes as metastases from mamma carcinoma         | -           | correct                                                   |
| 41   | m   | 23  | 6.0             | yes        | pT4b           | IIC  | lower leg            | normal        | colon carcinoma with lynch syndrome                                                                | -           | correct                                                   |
| 42   | f   | 87  | 4.0             | yes        | pT3b           | IIIC | finger               | normal        | negative                                                                                           | positive    | false negative                                            |
| 43   | f   | 58  | 5.2             | yes        | pT4b           | IIIC | trunk                | normal        | negative                                                                                           | positive    | false negative                                            |
| 44   | f   | 20  | 4.8             | no         | pT4a           | IIIC | trunk                | normal        | negative                                                                                           | positive    | false negative                                            |
| 45   | m   | 53  | 7.1             | yes        | pT4b           | IIIC | trunk                | normal        | negative                                                                                           | positive    | false negative                                            |
| 46   | f   | 56  | >3              | yes        | pT3b, R1       | IIIC | lower leg            | normal        | negative                                                                                           | positive    | false negative                                            |
| 47   | f   | 80  | >4              | yes        | pT4b           | IIIC | finger               | normal        | negative                                                                                           | positive    | false negative                                            |
| 48   | m   | 68  | 4.5             | yes        | pT4b           | IIIC | trunk                | normal        | negative                                                                                           | positive    | false negative                                            |
| 49   | f   | 80  | ##              | ##         | ALM            | III  | foot                 | elevated      | negative                                                                                           | positive    | false negative                                            |
| 50   | f   | 62  | 6.4             | no         | pT4a           | IIIA | trunk                | normal        | negative                                                                                           | positive    | false negative                                            |
| 51   | m   | 54  | 15              | yes        | pT4b           | IIIC | upper leg            | elevated      | negative                                                                                           | positive    | false negative                                            |
| 52   | f   | 73  | >5              | yes        | pT4b           | IIIC | foot                 | normal        | negative                                                                                           | positive    | false negative                                            |
| 53   | m   | 41  | 5.0             | yes        | pT4b           | IIIC | upper leg            | elevated      | metabolically active inguinal lymph node without CT correlate                                      | positive    | false negative                                            |
| 54   | m   | 80  | 6.0             | yes        | pT4b           | IIIC | trunk                | elevated      | generalized multiple suspect lymph nodes and bone marrow expansion, non-Hodgkin lymphoma suspected | positive    | false negative                                            |
| 55   | m   | 63  | 4.5             | yes        | pT4b           | IIIC | lower leg            | normal        | prostate cancer with single prominent retroperitoneal lymph nodes                                  | positive    | false negative                                            |
| 56   | f   | 59  | 11              | yes        | pT4b           | IIIC | trunk                | normal        | metabolically active soft tissue tumor on foot                                                     | positive    | false negative                                            |
| 57   | f   | 58  | 5.8             | no         | pT4a           | IIIC | foot                 | elevated      | unclear pulmonary nodule, compatible with metastasis, histologically identified as carcinoid       | positive    | false negative for lymph node metastasis                  |
| 58   | f   | 79  | 8               | yes        | pT4b           | IIC  | trunk                | normal        | negative                                                                                           | negative    | impossible                                                |
| 59   | m   | 60  | 5.8             | no         | pT4a           | IIB  | trunk                | normal        | negative                                                                                           | -           | impossible                                                |
| 60   | f   | 71  | 4.5             | no         | pT4a           | IIB  | lower leg            | normal        | negative                                                                                           | -           | impossible                                                |
| (61) | f   | 57  | 6               | yes        | pT4b           | IIC  | foot                 | normal        | negative                                                                                           | negative    | correct                                                   |
| (62) | m   | 74  | 4.2             | yes        | pT4b           | IIC  | trunk                | normal        | negative                                                                                           | negative    | correct                                                   |
| (63) | m   | 82  | 4.0             | yes        | pT3b           | IIB  | foot                 | normal        | negative                                                                                           | negative    | correct                                                   |
| (64) | m   | 38  | 6               | yes        | pT4b           | IIC  | trunk                | normal        | negative                                                                                           | negative    | impossible                                                |
| (65) | m   | 86  | 4.1             | yes        | pT4b           | IIIC | trunk                | elevated      | negative                                                                                           | negative    | impossible                                                |

\* LDH or S-100 above reference values, # mucosal melanoma, ## unknown, ALM acrolentiginous melanoma, ( ) CT only
